# Supplementary material
Source: HighWire-hosted journal article supplement (https://bmjopen.bmj.com/content/8/4/e020840)
Supplement: inline-supplementary-material-1 [file inline-supplementary-material-1.pdf]

**Appendix 1.** Complete list of key words used to search the most relevant databases for the studies to be included in the present review.

|                                            |     |                                     |
|--------------------------------------------|-----|-------------------------------------|
| Minimally invasive dentistry caries        |     |                                     |
| Dental Caries/therapy*                     | AND | Ultrasonic Therapy/instrumentation* |
| Dental Cavity Preparation/instrumentation* | AND | Ultrasonic Therapy/instrumentation* |
| Dental Cavity Preparation/methods          | AND | Ultrasonic Therapy/instrumentation* |
| Tooth Preparation/instrumentation*         | AND | Ultrasonic Therapy/instrumentation* |
| Dental Caries/therapy*                     | AND | Oscillometry/instrumentation        |
| Dental Cavity Preparation/instrumentation* | AND | Oscillometry/instrumentation        |
| Dental Cavity Preparation/methods          | AND | Oscillometry/instrumentation        |
| Tooth Preparation/instrumentation*         | AND | Oscillometry/instrumentation        |
| Dental Caries/therapy*                     | AND | Sonic                               |
| Dental Cavity Preparation/instrumentation* | AND | Sonic                               |
| Dental Cavity Preparation/methods          | AND | Sonic                               |
| Tooth Preparation/instrumentation*         | AND | Sonic                               |
| Dental Caries/therapy*                     | AND | Ultrasonic Therapy/adverse effects  |
| Dental Cavity Preparation/instrumentation* | AND | Ultrasonic Therapy/adverse effects  |
| Dental Cavity Preparation/methods          | AND | Ultrasonic Therapy/adverse effects  |
| Dental Caries/therapy*                     | AND | Sonication                          |
| Dental Cavity Preparation/instrumentation* | AND | Sonication                          |
| Dental Cavity Preparation/methods          | AND | Sonication                          |
| Tooth Preparation/instrumentation*         | AND | Sonication                          |
| Dental Caries/therapy*                     | AND | Oscillometry/adverse effects        |
| Dental Cavity Preparation/instrumentation* | AND | Oscillometry/adverse effects        |
| Dental Cavity Preparation/methods          | AND | Oscillometry/adverse effects        |
| Tooth Preparation/instrumentation*         | AND | Oscillometry/adverse effects        |
| Dental Caries/therapy*                     | AND | Sonoabrasive                        |

|                                               |     |              |
|-----------------------------------------------|-----|--------------|
| Dental Cavity<br>Preparation/instrumentation* | AND | Sonoabrasive |
| Dental Cavity Preparation/methods             | AND | Sonoabrasive |
| Tooth Preparation/instrumentation*            | AND | Sonoabrasive |

**Appendix 2.** The reasons leading to the exclusion of retrieved full texts.

| <b>n.</b> | <b>Author</b>    | <b>Reason for Exclusion</b> |
|-----------|------------------|-----------------------------|
| 1         | Banerjee 2000    | Literature narrative review |
| 2         | Josgrilberg 2007 | In vitro study              |
| 3         | Haase 1998       | Case report                 |
| 4         | Koczarski 2007   | Case report                 |
| 5         | Koubi 2008       | Descriptive study           |
| 6         | Mota 2013        | Descriptive study           |
| 7         | Ntovas 2017      | Literature narrative review |
| 8         | Predebon 2006    | Observational study)        |
| 9         | Sheets 2002      | Case report                 |
| 10        | Tassery 2013     | Descriptive study           |
| 11        | Thomas 2012      | Descriptive study           |
| 12        | Wicht 2002       | In vitro study              |
| 13        | Yildirim 2010    | In vitro study              |
